# Supplementary material for: Lamalbid, Chlorogenic Acid, and Verbascoside as Tools for Standardization of Lamium album Flowers—Development and Validation of HPLC–DAD Method
Source: PubMed Central journal article supplement (PMC7180761; doi:10.3390/molecules25071721), 2020-04-09

Supplementary Materials

# Lamalbid, chlorogenic acid, and verbascoside as the tools for standardization of *Lamium album* flowers-development and validation of HPLC-DAD method

Monika E. Czerwińska <sup>1,\*</sup>, Eleonora Kalinowska<sup>2</sup>, Dominik Popowski <sup>1</sup>, and Agnieszka Bazyłko <sup>1</sup>

<sup>1</sup> Department of Pharmacognosy and Molecular Basis of Phytotherapy, Medical University of Warsaw, 1 Banach street, 02-097 Warsaw, Poland; [mczerwinska@wum.edu.pl](mailto:mczerwinska@wum.edu.pl) (M.E.C);

[dominik.popowski@wum.edu.pl](mailto:dominik.popowski@wum.edu.pl) (D.P.); [agnieszka.bazylko@wum.edu.pl](mailto:agnieszka.bazylko@wum.edu.pl) (A.B.)

<sup>2</sup> Students' Scientific Association at the Department of Pharmacognosy and Molecular Basis of Phytotherapy, Medical University of Warsaw, 1 Banach street, 02-097 Warsaw, Poland; [eleonora\\_kalinowska@op.pl](mailto:eleonora_kalinowska@op.pl)

\* Correspondence: [mczerwinska@wum.edu.pl](mailto:mczerwinska@wum.edu.pl); Tel+48-22-572-0953

**Lamalbid (1)**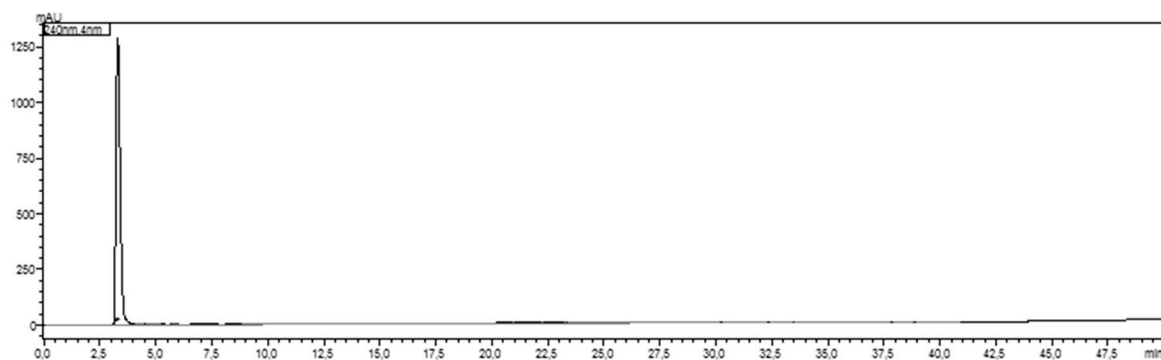

Figure S1. HPLC-DAD chromatogram registered for standard of lamalbid (1).

**Scheme S1. Analysis of residual sum of squares for lamalbid (1).**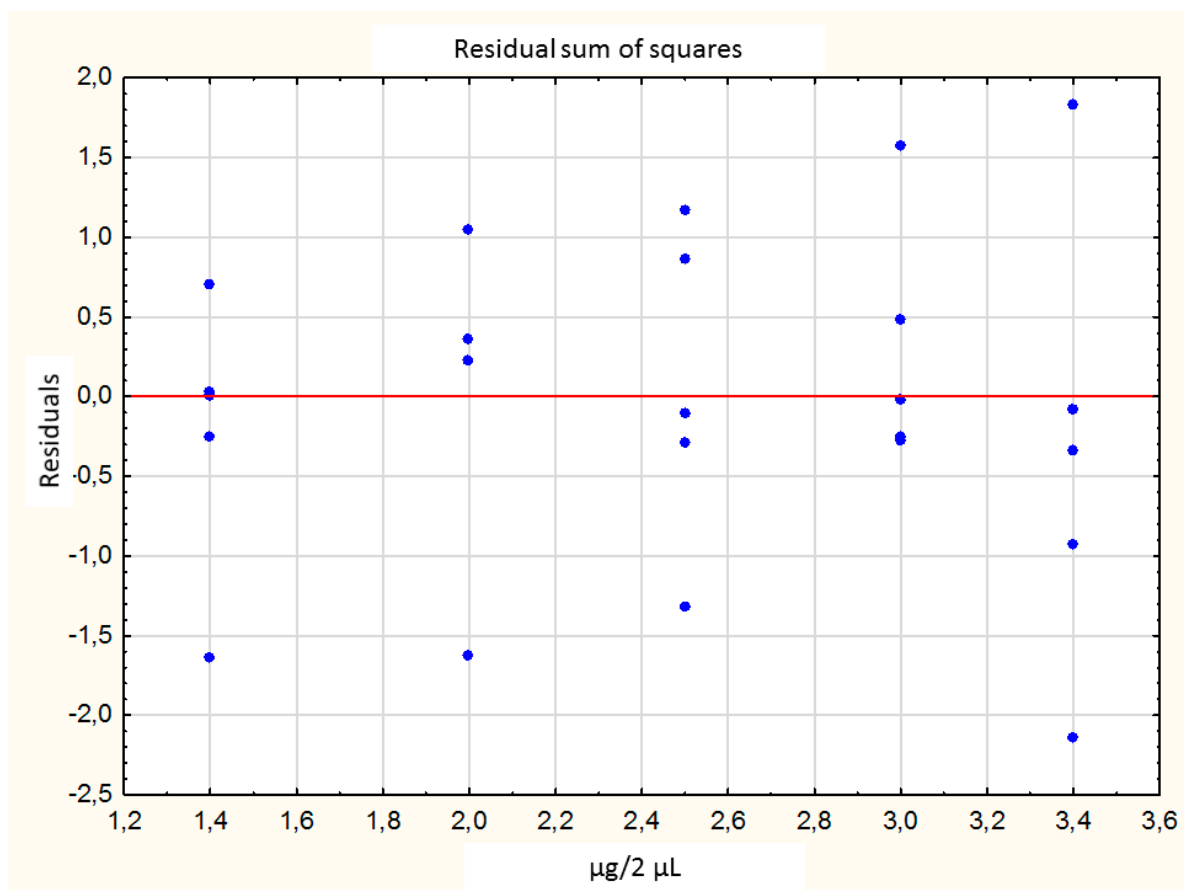

### Chlorogenic acid (3)

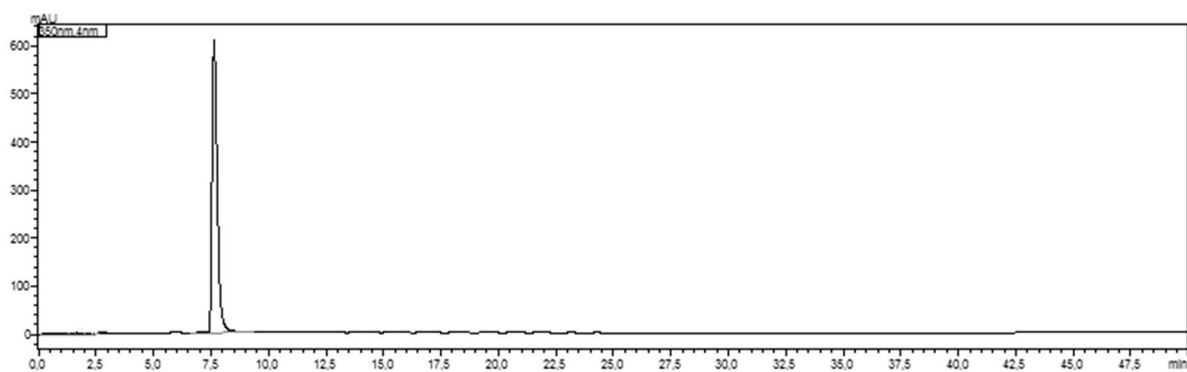

Figure S2. HPLC-DAD chromatogram registered for standard of chlorogenic acid (3).

### Scheme S2. Analysis of residual sum of squares for chlorogenic acid (3).

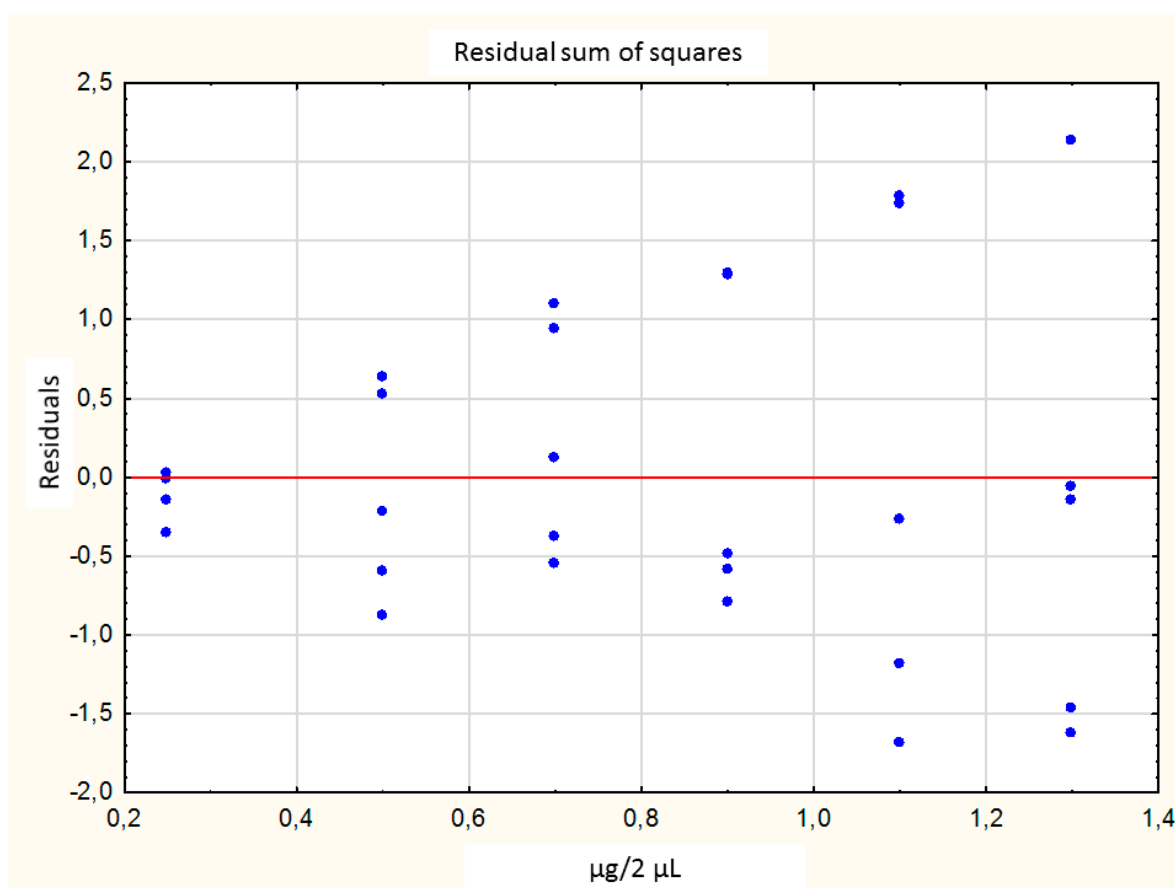

**Rutin (4)**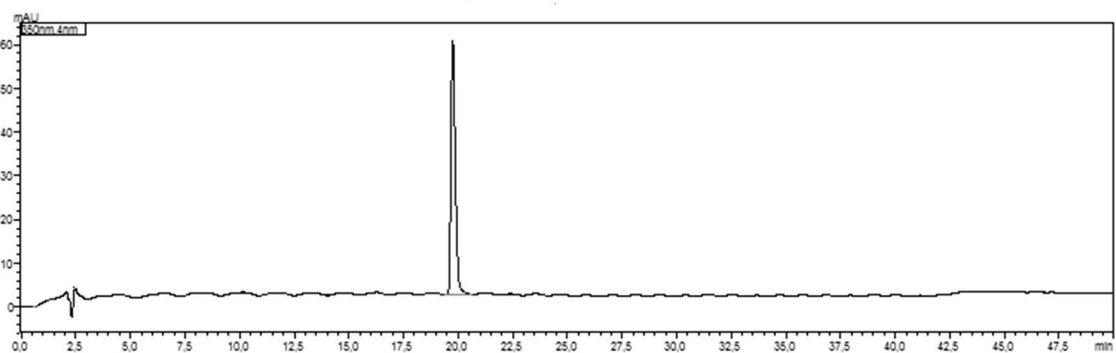

Figure S3. HPLC-DAD chromatogram registered for standard of rutin (4).

**Scheme S3. Analysis of residual sum of squares for rutin (4).**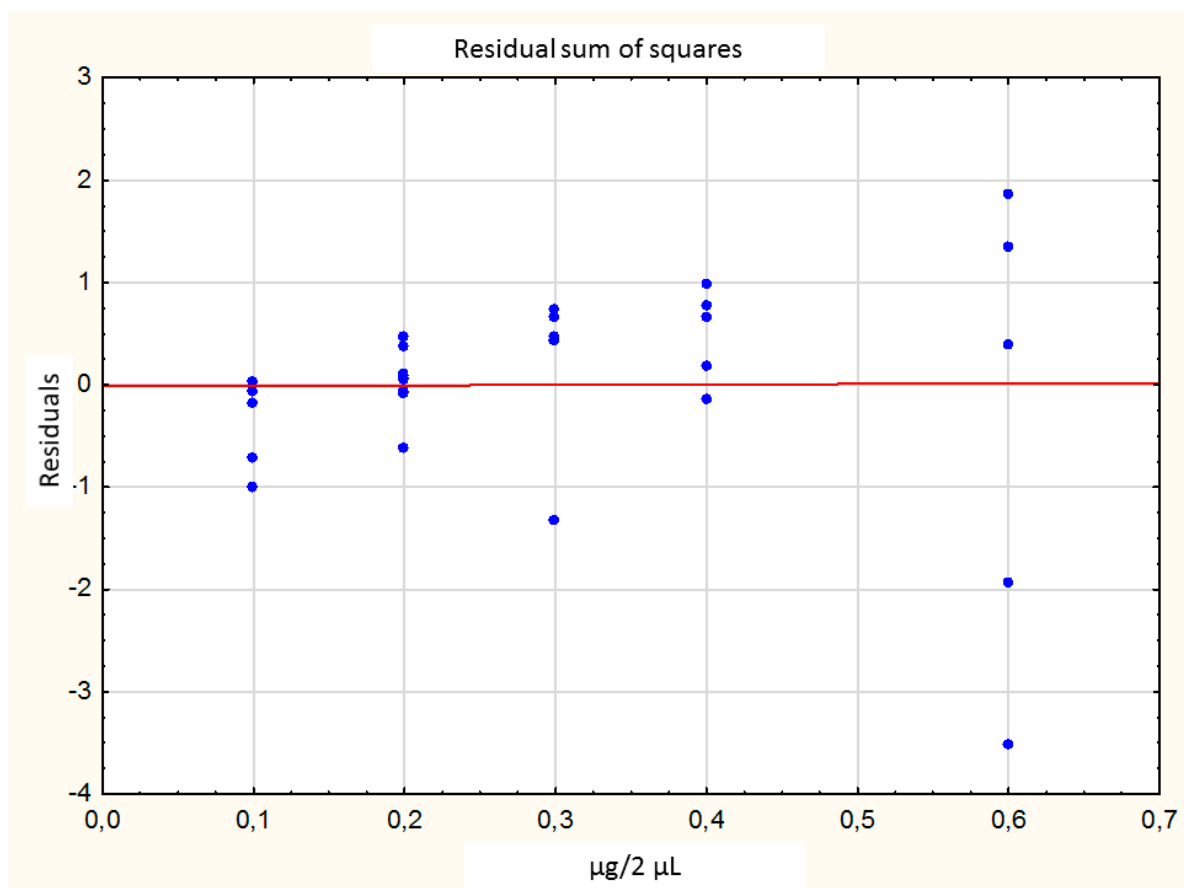

**Verbascoside (6)**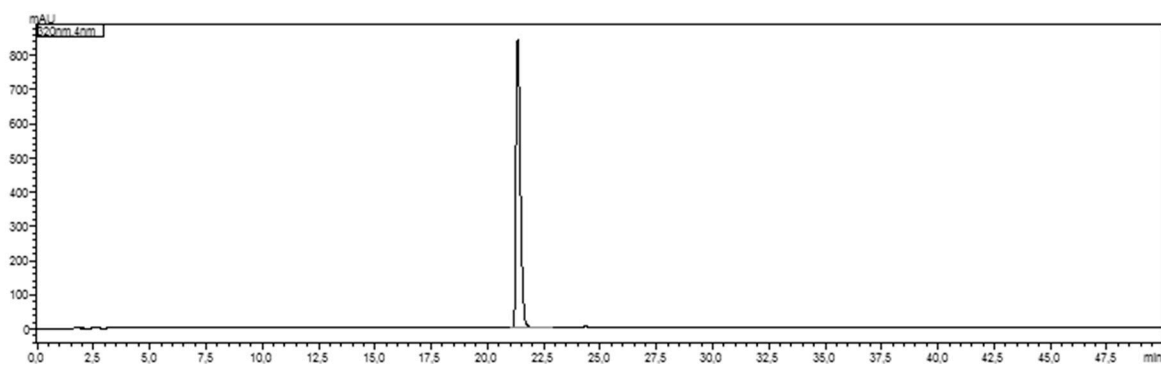

**Figure S4.** HPLC-DAD chromatogram registered for standard of verbascoside (6).

**Scheme S4.** Analysis of residual sum of square for verbascoside (6).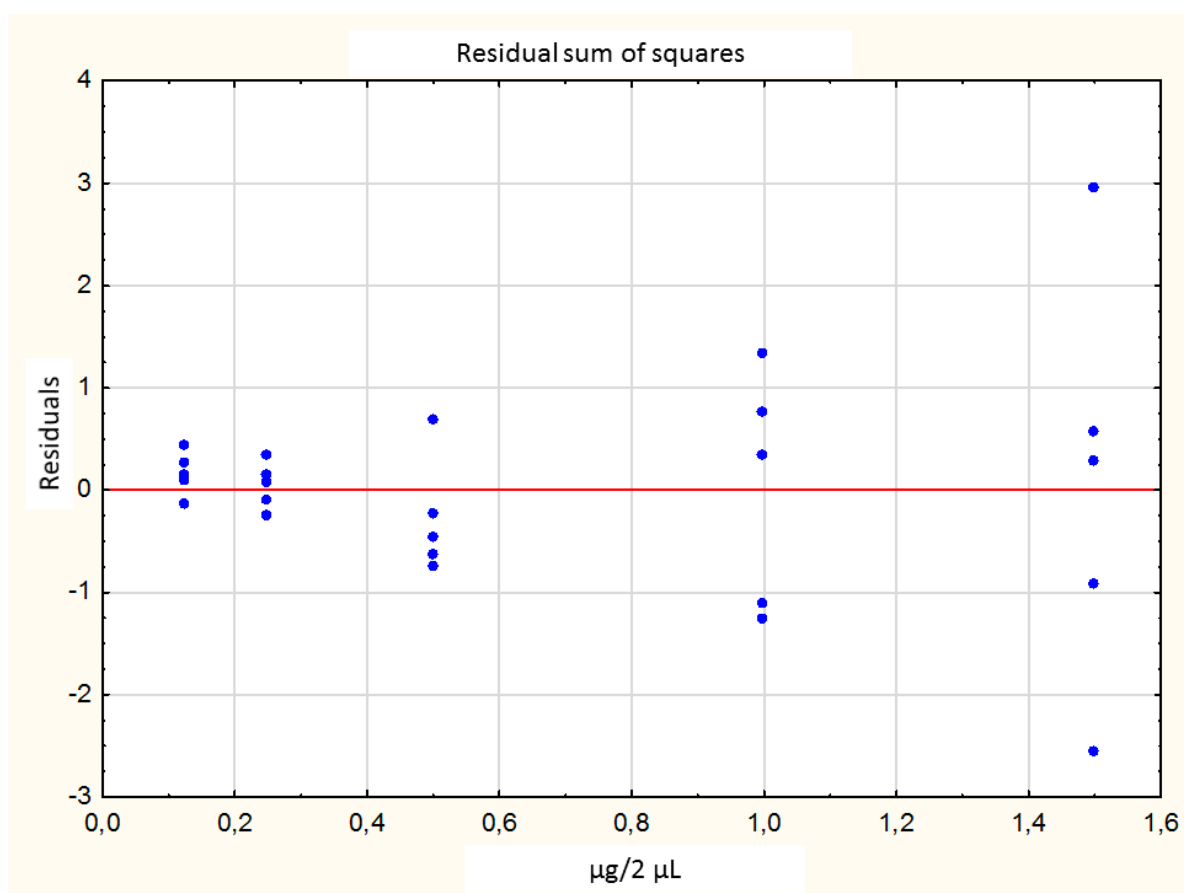

### Quercetin malonylhexoside (7)

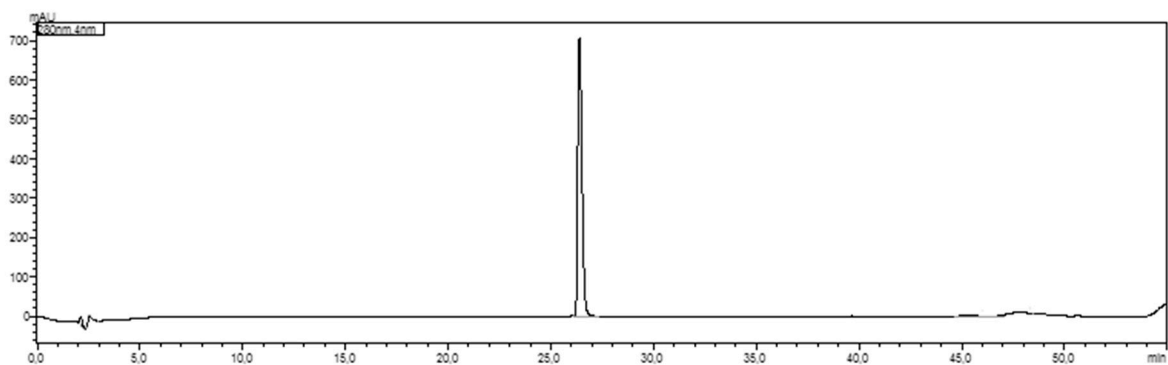

Figure S5. HPLC-DAD chromatogram registered for standard of quercetin malonylhexoside (7).

### Scheme S5. Analysis of residual sum of squares for quercetin malonylhexoside (7).

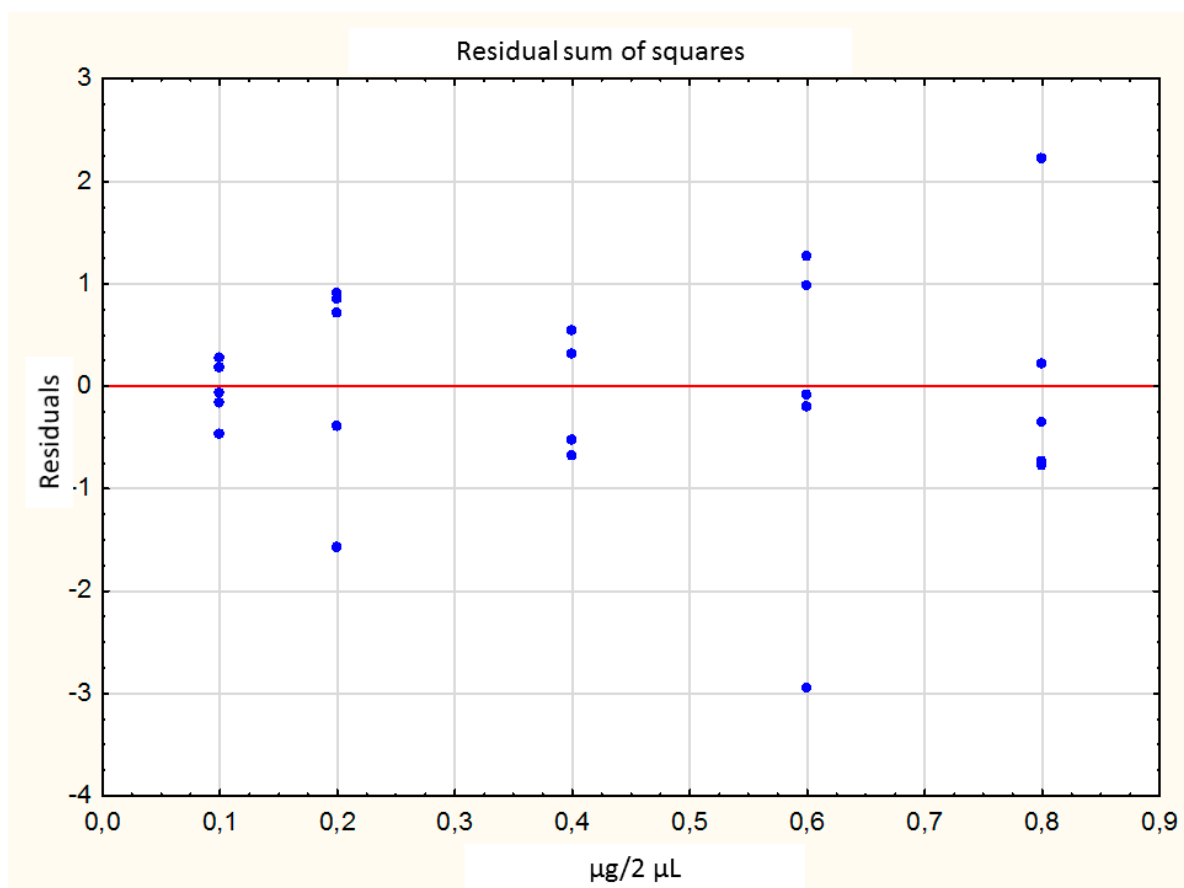

**Tiliroside (8)**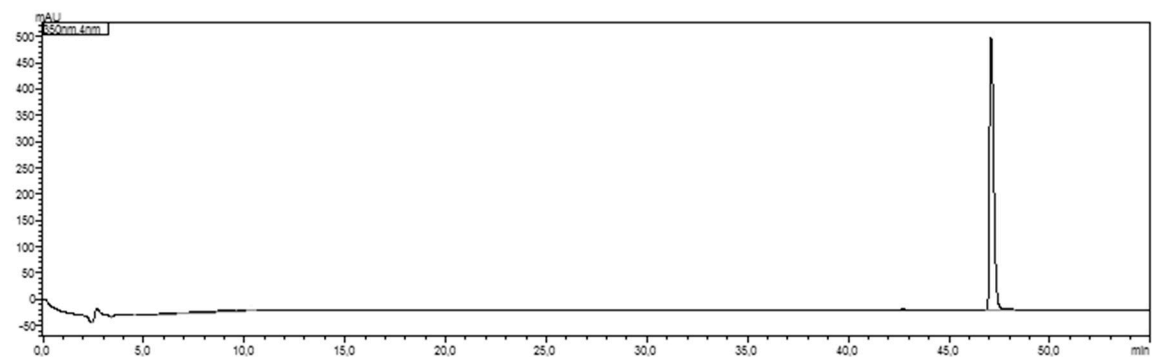

Figure S6. HPLC-DAD chromatogram registered for standard of tiliroside (8).

**Scheme S6. Analysis of residual sum of squares for tiliroside (8).**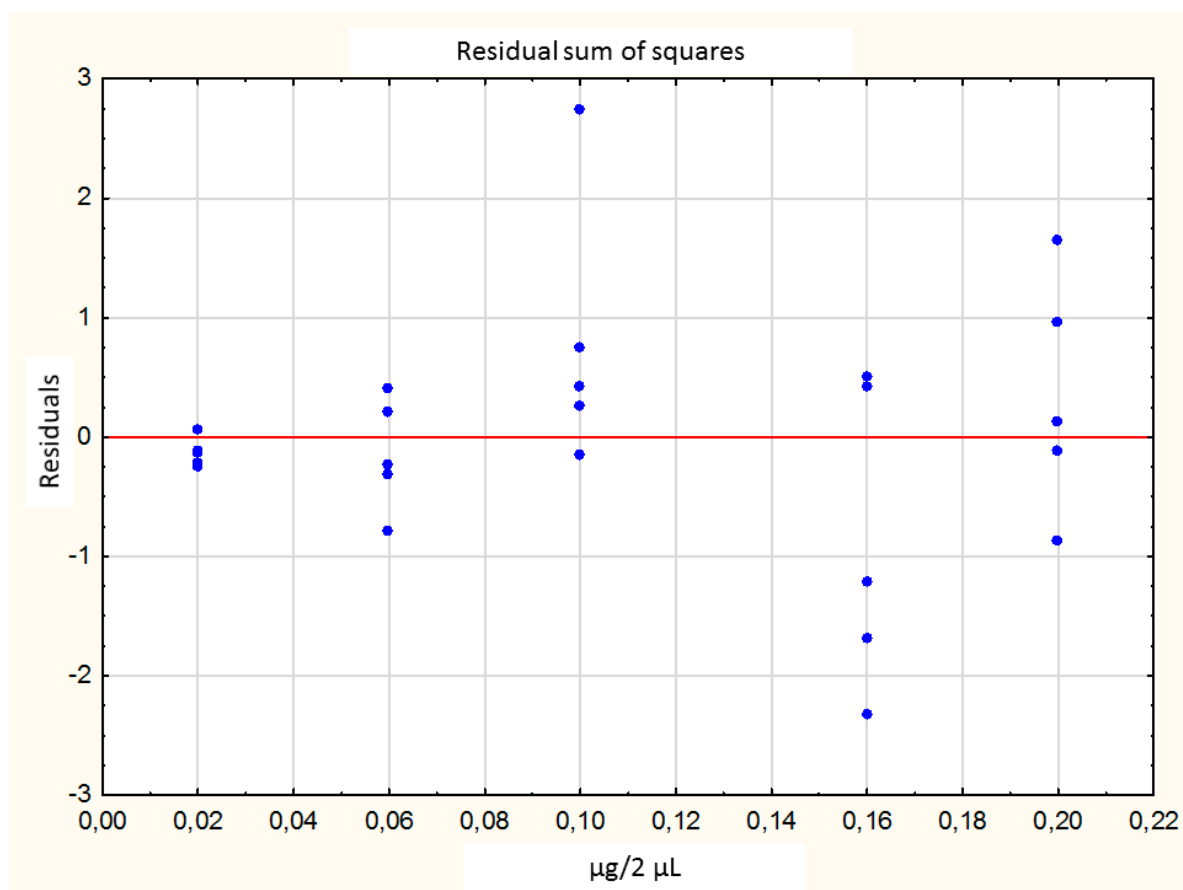

Supplement: molecules-25-01721-s001.pdf [file molecules-25-01721-s001.pdf]
